# Supplementary material
Source: Springer Nature journal article supplement (https://www.springermedizin.de/resource/supplementary/12986_2007_114_MOESM2_ESM.pdf/25655390)

**Caucasian +Black +Hispanic  
Males: age 18 to 89**

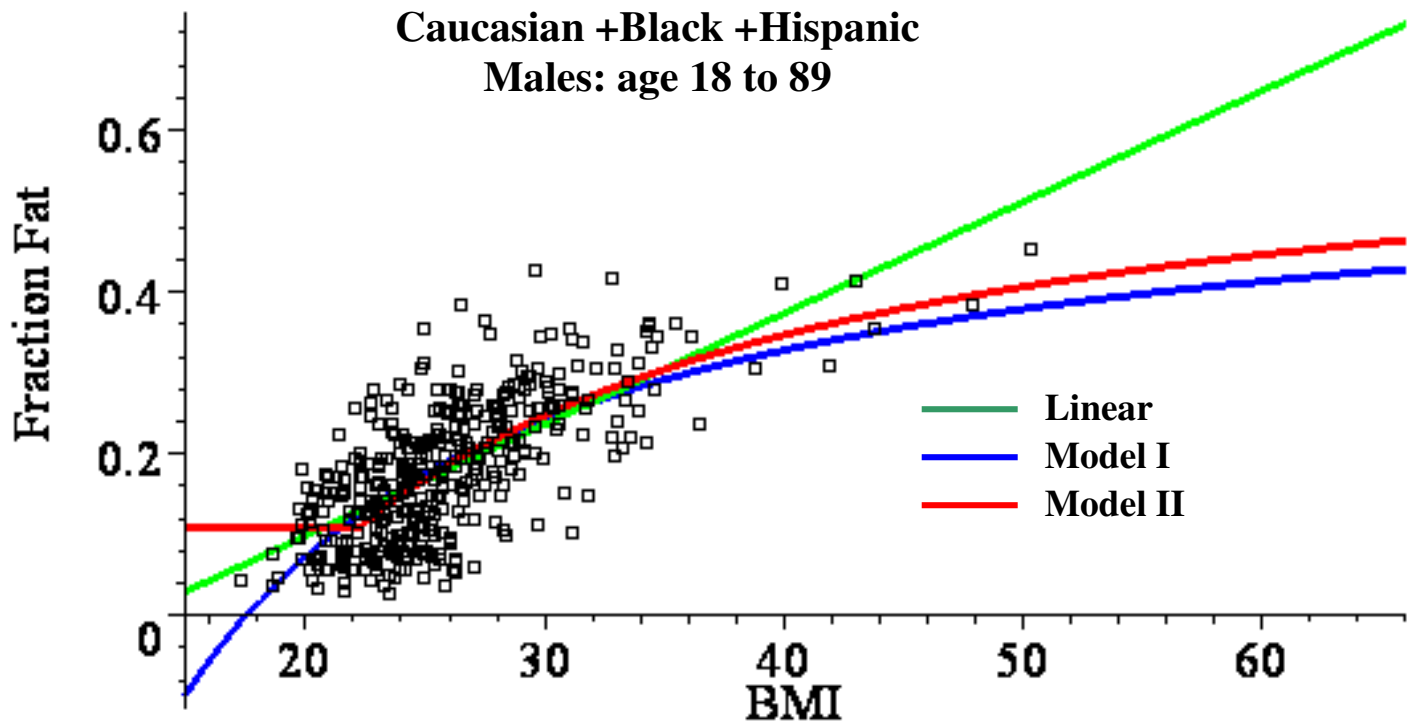

**Caucasian +Black +Hispanic  
Females: age 18 to 90**

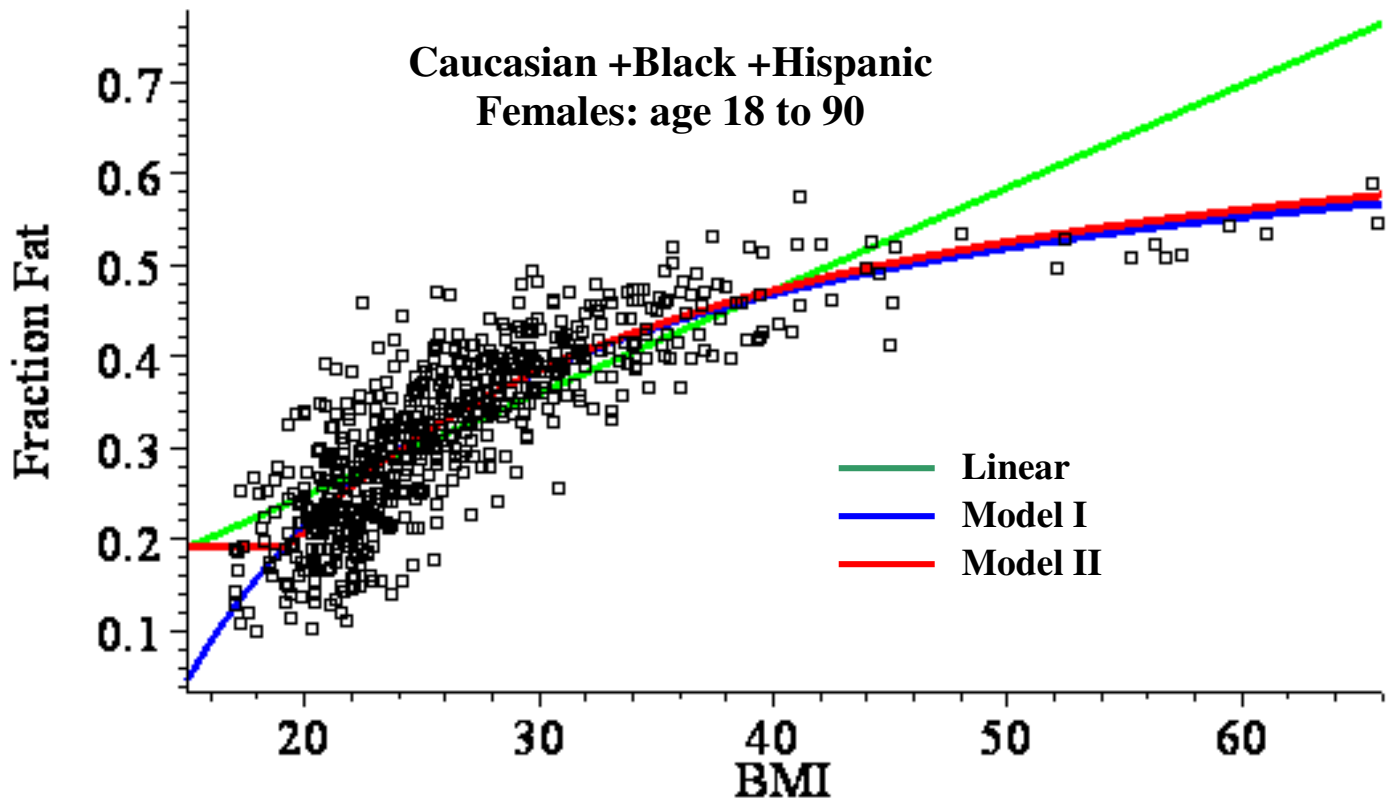

Supplement: MOESM2 [file 25655390]
